# Supplementary material
Source: PubMed Central journal article supplement (PMC5735426)
Supplement: NIHMS923579-supplement-supplemental_tables.pdf [file NIHMS923579-supplement-supplemental_tables.pdf]

Supplementary Table 1: Host transcripts identified as unique to exosomes released from *M. tuberculosis* infected macrophages

| No. | Transcript ID | Description                                                                                                                                                                                                  |
|-----|---------------|--------------------------------------------------------------------------------------------------------------------------------------------------------------------------------------------------------------|
| 1.  | NM_008491     | 'Lcn2'; alt '24p3 AW212229 NGAL'; lipocalin 2                                                                                                                                                                |
| 2.  | XM_887648     | gene_name '1700045111Rik'; alt '-'; RIKEN cDNA 1700045111                                                                                                                                                    |
| 3.  | NM_009971     | 'Csf3'; alt 'Csfg G-CSF'; colony stimulating factor 3 (granulocyte)                                                                                                                                          |
| 4.  | XM_972624     | gene_name 'LOC664783'; alt '-'; similar to double homeobox 4c                                                                                                                                                |
| 5.  | NM_015809     | gene_name 'Krtap5-4'; alt '-'; keratin associated protein 5-4                                                                                                                                                |
| 6.  | XM_898350     | gene_name 'LOC624422'; alt '-'; hypothetical LOC624422                                                                                                                                                       |
| 7.  | NM_032541     | gene_name 'Hamp1'; alt 'Hamp Hepc Hepc1'; hepcidin antimicrobial peptide 1                                                                                                                                   |
| 8.  | NM_011171     | gene_name 'Procr'; alt 'AI325044 Ccca EPCR'; protein C receptor, endothelial                                                                                                                                 |
| 9.  | XM_972817     | gene_name 'LOC664808'; alt '-'; similar to transcription elongation factor B polypeptide 3C                                                                                                                  |
| 10. | XM_975981     | gene_name 'LOC665305'; alt '-'; hypothetical protein LOC665305                                                                                                                                               |
| 11. | XM_888852     | gene_name 'LOC624310'; alt '-'; hypothetical LOC624310                                                                                                                                                       |
| 12. | XM_974918     | gene_name 'LOC665159'; alt '-'; similar to microtubule-associated protein 1A                                                                                                                                 |
| 13. | XM_991636     | gene_name 'LOC667640'; alt '-'; similar to Transcription elongation factor B polypeptide 3 (RNA polymerase II transcription factor SIII subunit A1) (SIII p110) (Elongin A) (EloA) (Elongin 110 kDa subunit) |
| 14. | XM_356464     | gene_name 'Gm1153'; alt 'Tmf1'; gene model 1153,                                                                                                                                                             |
| 15. | NM_001024708  | gene_name 'LOC436177'; alt '-'; similar to Cadherin-11 precursor (Osteoblast-cadherin) (OB-cadherin) (OSF-4)                                                                                                 |
| 16. | XM_897653     | gene_name 'LOC623296'; alt '-'; hypothetical LOC623296                                                                                                                                                       |
| 17. | XM_990441     | gene_name 'LOC667415'; alt '-'; hypothetical protein LOC667415                                                                                                                                               |
| 18. | NM_009635     | gene_name 'Avil'; alt 'Advil DOC6'; advillin                                                                                                                                                                 |
| 19. | XM_982314     | gene_name 'LOC666207'; alt '-'; similar to Spetex-2E protein                                                                                                                                                 |
| 20. | XM_888549     | gene_name 'LOC624023'; alt '-'; hypothetical LOC624023                                                                                                                                                       |
| 21. | NM_001034869  | gene_name 'LOC245263'; alt '-'; similar to double homeobox, 4                                                                                                                                                |
| 22. | NM_183119     | gene_name '2410141K09Rik'; alt '-'; RIKEN cDNA 2410141K09 gene                                                                                                                                               |
| 23. | XM_001001648  | gene_name 'LOC668470'; alt '-'; hypothetical protein LOC668470                                                                                                                                               |
| 24. | NM_175533     | gene_name '5830411N06Rik'; alt '-'; RIKEN cDNA 5830411N06 gene                                                                                                                                               |
| 25. | XM_620264     | gene_name 'LOC545814'; alt '-'; sperm motility kinase 2-like                                                                                                                                                 |
| 26. | NM_172708     | gene_name 'A930013K19Rik'; alt 'MGC107606'; RIKEN cDNA A930013K19 gene                                                                                                                                       |

|     |              |                                                                                                                                              |
|-----|--------------|----------------------------------------------------------------------------------------------------------------------------------------------|
| 27. | NM_015783    | gene_name 'Isg15'; alt '15kDa G1p2 IGI15 IP17 Irfp MGC103144 MGC130321 UCRP'; ISG15 ubiquitin-like modifier                                  |
| 28. | XM_894566    | gene_name '2810032E02Rik'; alt 'MGC118314'; RIKEN cDNA 2810032E02 gene                                                                       |
| 29. | XM_902425    | gene_name 'Gm88'; alt '-'; gene model 88,                                                                                                    |
| 30. | NM_001025379 | gene_name 'Sema3g'; alt 'AK129018'; sema domain, immunoglobulin domain (Ig), short basic domain, secreted, (semaphorin) 3G                   |
| 31. | NM_033616    | gene_name 'Csprs'; alt 'D1Lub1 HSR MGC29132'; component of Sp100-rs                                                                          |
| 32. | NM_008218    | gene_name 'Hba-a1'; alt 'Hba1'; hemoglobin alpha, adult chain 1                                                                              |
| 33. | XM_886613    | gene_name 'LOC622201'; alt '-'; similar to reproductive homeobox on X chromosome 2                                                           |
| 34. | NM_145440    | gene_name 'Uts2r'; alt 'Gpr14 UTR UTR2'; urotensin 2 receptor                                                                                |
| 35. | XM_486090    | gene_name 'Nkx6-3'; alt '9130417I07Rik Nkx6.3'; NK6 transcription factor related, locus 3                                                    |
| 36. | NM_001033128 | gene_name 'Bbs1'; alt 'AI451249 D19Ertd609e'; Bardet-Biedl syndrome 1 homolog (human)                                                        |
| 37. | NM_011124    | gene_name 'Ccl21b'; alt '6CKBAC2 6Ckine ALP AW987545 CKb9 MGC107632 SLC Scya21 Scya21b Tca4 plt'; chemokine (C-C motif) ligand 21b           |
| 38. | XM_892362    | gene_name 'LOC627670'; alt '-'; similar to coiled-coil-helix-coiled-coil-helix domain containing 2                                           |
| 39. | XM_001003727 | gene_name 'LOC668807'; alt '-'; hypothetical protein LOC668807                                                                               |
| 40. | XM_886726    | gene_name 'LOC622301'; alt '-'; similar to reproductive homeobox on X chromosome 2                                                           |
| 41. | NM_028362    | gene_name '2410018L13Rik'; alt '2810480C08Rik'; RIKEN cDNA 2410018L13 gene                                                                   |
| 42. | NM_009421    | gene_name 'Traf1'; alt '4732496E14Rik'; Tnf receptor-associated factor 1                                                                     |
| 43. | XM_974176    | gene_name 'LOC665048'; alt '-'; similar to ribosomal protein S8                                                                              |
| 44. | NM_010487    | gene_name 'Elavl3'; alt 'Huc PLE21 mHuC'; ELAV (embryonic lethal, abnormal vision, Drosophila)-like 3 (Hu antigen C)                         |
| 45. | XM_128114    | gene_name '4930415O20Rik'; alt '-'; RIKEN cDNA 4930415O20 gene                                                                               |
| 46. | NM_009824    | gene_name 'Cbfa2t3h'; alt 'A630044F12Rik ETO-2 MTGR2'; core-binding factor, runt domain, alpha subunit 2, translocated to, 3 homolog (human) |

Supplementary Table 2: Host transcripts identified as unique to exosomes released from uninfected macrophages.

| Number | Transcript ID | Description                                                                                                                                                                                                              |
|--------|---------------|--------------------------------------------------------------------------------------------------------------------------------------------------------------------------------------------------------------------------|
| 1.     | NM_009127     | gene_name 'Scd1'; alt 'AA589638 AI265570 SCD Scd-1 ab'; stearoyl-Coenzyme A desaturase 1                                                                                                                                 |
| 2.     | NM_175149     | gene_name '2310022B05Rik'; alt '-'; RIKEN cDNA 2310022B05 gene                                                                                                                                                           |
| 3.     | NM_173032     | gene_name 'A630047E20Rik'; alt '9430001M19'; RIKEN cDNA A630047E20 gene                                                                                                                                                  |
| 4.     | NM_145480     | gene_name 'Rfc4'; alt 'A1 AI894123 AU040575 RFC37'; replication factor C (activator 1) 4                                                                                                                                 |
| 5.     | NM_010559     | gene_name 'Il6ra'; alt 'CD126 IL-6R Il6r MGC30256'; interleukin 6 receptor, alpha                                                                                                                                        |
| 6.     | NM_181316     | gene_name 'E130103I17Rik'; alt '-'; RIKEN cDNA E130103I17 gene                                                                                                                                                           |
| 7.     | XM_888002     | gene_name 'LOC545091'; alt '-'; similar to Heterogeneous nuclear ribonucleoprotein A1 (Helix-destabilizing protein) (Single-strand binding protein) (hnRNP core protein A1) (HDP-1) (Topoisomerase-inhibitor suppressed) |
| 8.     | NM_198710     | gene_name 'Syp1'; alt 'AI314763 AI604763 D12Erd446e Pan I Pphn'; synaptophysin-like protein                                                                                                                              |
| 9.     | NM_138313     | gene_name 'Bmf'; alt 'AW260063 AW411872'; Bcl2 modifying factor                                                                                                                                                          |
| 10.    | NM_010852     | gene_name 'Myef2'; alt '9430071B01 mKIAA1341'; myelin basic protein expression factor 2, repressor                                                                                                                       |
| 11.    | NM_019989     | gene_name 'Sh3bgr1'; alt '1190008F14Rik'; SH3-binding domain glutamic acid-rich protein like                                                                                                                             |
| 12.    | NM_023735     | gene_name 'Actr3'; alt '1200003A09Rik Arp3 MGC118188'; ARP3 actin-related protein 3 homolog (yeast)                                                                                                                      |
| 13.    | NM_016786     | gene_name 'Hip2'; alt 'AW492011 D5Erd601e'; huntingtin interacting protein 2                                                                                                                                             |
| 14.    | NM_080288     | gene_name 'Elmo1'; alt '6330578D22Rik AI173001 C230095H21Rik CED-12 KIAA0281 mKIAA0281'; engulfment and cell motility 1, ced-12 homolog (C. elegans)                                                                     |
| 15.    | NM_009179     | gene_name 'St3gal2'; alt 'AI429591 AW822065 ST3GalII Siat5'; ST3 beta-galactoside alpha-2,3-sialyltransferase 2                                                                                                          |
| 16.    | NM_025613     | gene_name 'Cri1'; alt '2610002K20Rik EID-1 EID1 ORF12 PNAS-22 PTD014'; CREBBP/EP300 inhibitory protein 1                                                                                                                 |
| 17.    | NM_026541     | gene_name 'Josd3'; alt '2810003M17Rik 4930553M18Rik 5930426I11Rik MGC117821'; Josephin domain containing 3                                                                                                               |
| 18.    | NM_020567     | gene_name 'Gmn'; alt 'AW546347 Gem'; geminin                                                                                                                                                                             |
| 19.    | NM_027439     | gene_name 'Atp6ap2'; alt '5730403E06Rik APT6M8-9 ATP6M8-9 Atp6ip2 M8-9'; ATPase, H+ transporting, lysosomal accessory protein 2                                                                                          |
| 20.    | NM_178677     | gene_name 'Sec22c'; alt '4932412K21 5930407I15Rik C530046H07 Sec22I3'; SEC22 vesicle trafficking protein-like C (S. cerevisiae)                                                                                          |
| 21.    | NM_009466     | gene_name 'Ugdh'; alt 'Udpgdh'; UDP-glucose dehydrogenase                                                                                                                                                                |
| 22.    | NM_033371     | gene_name 'Ppp1r16a'; alt '2900084E10Rik Mypt3 R75527'; protein phosphatase 1, regulatory (inhibitor) subunit 16A                                                                                                        |
| 23.    | NM_001038018  | gene_name 'Gprk6'; alt 'GRK6'; G protein-coupled receptor kinase 6                                                                                                                                                       |

|     |              |                                                                                                                    |
|-----|--------------|--------------------------------------------------------------------------------------------------------------------|
| 23. | NM_013876    | gene_name 'Rnf11'; alt '-'; ring finger protein 11                                                                 |
| 24. | NM_146234    | gene_name 'Tmem32'; alt '9630048L06Rik BC032271 MGC40705'; transmembrane protein 32                                |
| 25. | NM_026579    | gene_name 'D10Wsu102e'; alt 'A1747614 C430041I18Rik'; DNA segment, Chr 10, Wayne State University 102, expressed   |
| 26. | NM_009071    | gene_name 'Rock1'; alt '1110055K06Rik Rock-I'; Rho-associated coiled-coil forming kinase 1                         |
| 27. | NM_023906    | gene_name 'Asb3'; alt '2400011J03Rik'; ankyrin repeat and SOCS box-containing protein 3                            |
| 28. | XM_992330    | gene_name 'Arid1a'; alt '1110030E03Rik Osa1 Smarf1'; AT rich interactive domain 1A (Swi1 like)                     |
| 29. | NM_025435    | gene_name 'Thoc7'; alt '1500006O09Rik 9230101K24Rik Nif311bp1'; THO complex 7 homolog (Drosophila)                 |
| 30. | NM_001040435 | gene_name 'Tacc3'; alt 'Aint C86661'; transforming, acidic coiled-coil containing protein 3                        |
| 31. | NM_172549    | gene_name 'Cabin1'; alt 'A330070M20Rik Cain Ppp3in'; calcineurin binding protein 1                                 |
| 32. | NM_178116    | gene_name 'Camta2'; alt 'Kiaa0909-hp mKIAA0909'; calmodulin binding transcription activator 2                      |
| 33. | NM_009955    | gene_name 'Dpysl2'; alt 'AI851130 Crmp2 DRP2 Musunc33 TOAD-64 Ulip2'; dihydropyrimidinase-like 2                   |
| 34. | NM_026405    | gene_name 'Rab32'; alt '2810011A17Rik AU022057'; RAB32, member RAS oncogene family                                 |
| 35. | NM_001037905 | gene_name 'Dab2'; alt '5730435J12Rik AA960054 AI957090 D15Wsu122e Doc-2 Doc2 p96'; disabled homolog 2 (Drosophila) |
| 36. | NM_010306    | gene_name 'Gnai3'; alt 'AI158965 AW537698 Gnai-3'; guanine nucleotide binding protein, alpha inhibiting 3          |
| 37. | NM_172049    | gene_name 'Tmem18'; alt 'BC024093'; transmembrane protein 18                                                       |
| 38. | NM_026936    | gene_name 'Oxa11'; alt '1810020M02Rik AI894287'; oxidase assembly 1-like                                           |
| 39. | NM_080793    | gene_name 'Setd7'; alt '1600028F23Rik Set7 mKIAA1717'; SET domain containing (lysine methyltransferase) 7          |
| 40. | XM_925755    | gene_name 'LOC627557'; alt '-'; similar to nuclear receptor coactivator 4                                          |
| 41. | NM_007928    | gene_name 'Mark2'; alt 'AU024026 Emk KIAA4207 Par-1 mKIAA4207'; MAP/microtubule affinity-regulating kinase 2       |
| 42. | NM_134115    | gene_name 'Stk38'; alt '5830476G13Rik 9530097A09Rik AA617404 Ndr1'; serine/threonine kinase 38                     |
| 43. | NM_001013392 | gene_name 'Rreb1'; alt '1110037N09Rik AA414966 B930013M22Rik'; ras responsive element binding protein 1            |
| 44. | NM_134068    | gene_name 'Dusp22'; alt '1110028K04Rik AW212235 JKAP JSP1 MGC118031 MKPX'; dual specificity phosphatase 22         |
| 45. | XM_979298    | gene_name 'Bcor11'; alt '6720425J07Rik B930011H20Rik'; BCL6 co-repressor-like 1                                    |
| 46. | NM_028037    | gene_name 'Acad10'; alt '2410021P16Rik'; acyl-Coenzyme A dehydrogenase family, member 10                           |
| 47. | NM_009462    | gene_name 'Usp10'; alt '2610014N07Rik UBPO Uchrp mKIAA0190'; ubiquitin specific peptidase 10                       |
| 48. | XM_901632    | gene_name 'Alpk1'; alt '8430410J10Rik LAK'; alpha-kinase 1                                                         |

|     |           |                                                                                                                                                         |
|-----|-----------|---------------------------------------------------------------------------------------------------------------------------------------------------------|
| 49. | NM_177470 | gene_name 'Acaa2'; alt '0610011L04Rik AI255831 AI265397 D18ErtD240e'; acetyl-Coenzyme A acyltransferase 2 (mitochondrial 3-oxoacyl-Coenzyme A thiolase) |
| 50. | NM_016962 | gene_name 'Spast'; alt 'Spg4 mKIAA1083'; spastin                                                                                                        |
| 51. | NM_010172 | gene_name 'F7'; alt 'AI132620 Cf7 FVII mfVII'; coagulation factor VII                                                                                   |
| 52. | NM_011919 | gene_name 'Ing1'; alt '2610028J21Rik AA407184 AI875420 mING1h p33Ing1'; inhibitor of growth family, member 1                                            |
| 53. | XM_133655 | gene_name 'Atg16l2'; alt '2410118P20Rik'; autophagy related 16 like 2 (S. cerevisiae)                                                                   |
| 54. | NM_153395 | gene_name 'Mon2'; alt '2610528O22Rik AW495628 mKIAA1040'; MON2 homolog (yeast)                                                                          |
| 55. | NM_145509 | gene_name '5430435G22Rik'; alt '-'; RIKEN cDNA 5430435G22 gene                                                                                          |
| 56. | NM_008095 | gene_name 'Gbas'; alt 'AV006093 Nipsnap2'; glioblastoma amplified sequence                                                                              |
| 57. | XM_983221 | gene_name 'Zfp703'; alt '1110032O19Rik AI430822 AL022941 Csmn1 End2'; zinc finger protein 703                                                           |
| 58. | NM_007668 | gene_name 'Cdk5'; alt 'AW048668 Crk6'; cyclin-dependent kinase 5                                                                                        |
| 59. | NM_172774 | gene_name '6620401K05Rik'; alt '5930438A12 MGC90531'; RIKEN cDNA 6620401K05 gene                                                                        |
| 60. | NM_021420 | gene_name 'Stk4'; alt 'AI447339 AU020804 Kas-2 Mst1 Ysk3'; serine/threonine kinase 4                                                                    |
| 61. | NM_025629 | gene_name 'Adamts15'; alt '2010109H09Rik MGC41037 Thsd6'; ADAMTS-like 5                                                                                 |
| 62. | NM_008845 | gene_name 'Pip5k2a'; alt 'AW742916'; phosphatidylinositol-4-phosphate 5-kinase, type II, alpha                                                          |
| 63. | XM_978952 | gene_name 'LOC665563'; alt '-'; similar to methylenetetrahydrofolate dehydrogenase (NADP+ dependent) 2-like                                             |
| 64. | NM_008943 | gene_name 'Psen1'; alt 'Ad3h PS-1 PS1 S182'; presenilin 1                                                                                               |
| 65. | NM_146124 | gene_name 'Arhgap1'; alt 'B230365D05Rik C76222 MGC101942 MGC7050 p50rhoGAP'; Rho GTPase activating protein 1                                            |
| 66. | NM_025345 | gene_name '0610037P05Rik'; alt '-'; RIKEN cDNA 0610037P05 gene                                                                                          |
| 67. | XM_619824 | gene_name 'LOC545472'; alt '-'; similar to BTB (POZ) domain containing 1 (predicted)                                                                    |
| 68. | NM_029282 | gene_name '2610036D13Rik'; alt 'AI449463'; RIKEN cDNA 2610036D13 gene                                                                                   |

Supplementary Table 3: Functional Pathways identified in transcripts found in exosomes derived from *M. tuberculosis*-infected macrophages.

| Pathway                              | Number of genes | Gamma p value |
|--------------------------------------|-----------------|---------------|
| Proteasome                           | 24              | 1.80E-10      |
| Regulation of actin cytoskeleton     | 30              | 1.35E-04      |
| Toll-like receptor signaling pathway | 18              | 3.13E-04      |
| MAPK signaling pathway               | 34              | 3.95E-04      |
| Leukocyte transendothelial migration | 17              | 0.005792378   |
| Cell Cycle                           | 16              | 0.019879503   |

Supplementary Table 4: Functional Pathways identified in transcripts found in exosomes derived from uninfected macrophages.

| Pathway                              | Number of genes | Gamma p value |
|--------------------------------------|-----------------|---------------|
| Regulation of actin cytoskeleton     | 36              | 7.77E-06      |
| Toll-like receptor signaling pathway | 21              | 5.80E-05      |
| MAPK signaling pathway               | 37              | 5.81E-04      |
| DNA replication                      | 10              | 0.001139057   |
| Leukocyte transendothelial migration | 20              | 0.00169149    |
| Protein export                       | 5               | 0.00656143    |
| Cell cycle                           | 19              | 0.006689211   |
| Apoptosis                            | 15              | 0.013532871   |
| p53 signaling pathway                | 12              | 0.031367772   |
| Ubiquitin mediated proteolysis       | 19              | 0.036359682   |
