# Supplementary material
Source: PubMed Central journal article supplement (PMC5735426)

# Supplementary Figure 1

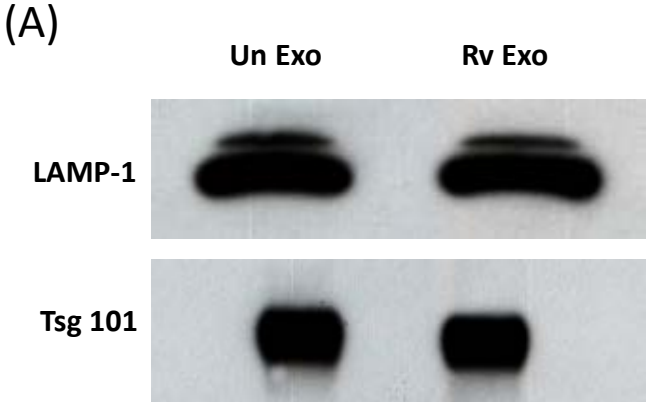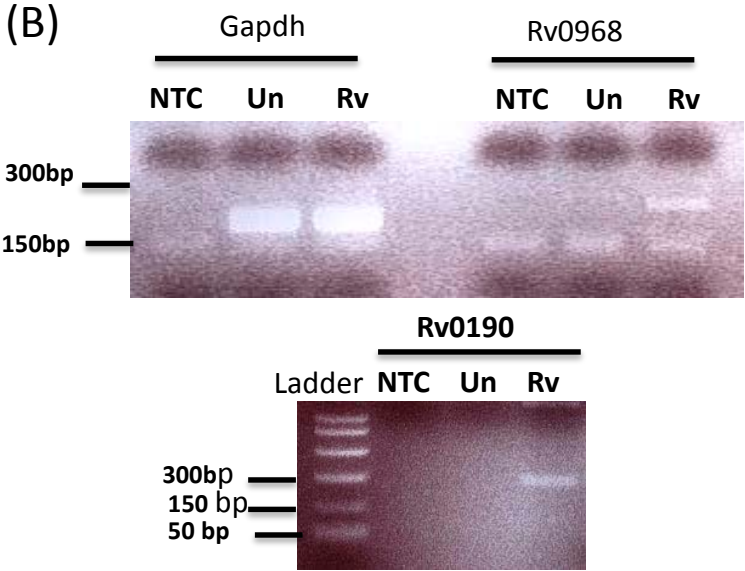

Supplementary Figure 2

WGA

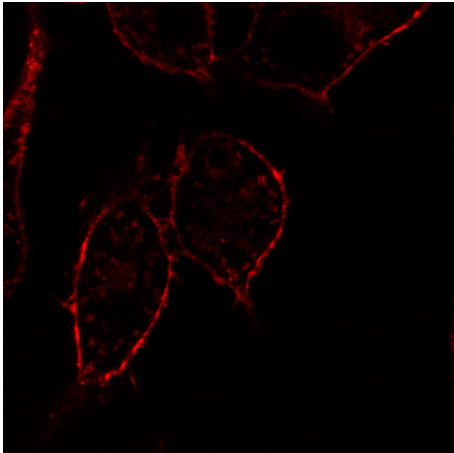

SYTO RNA Select

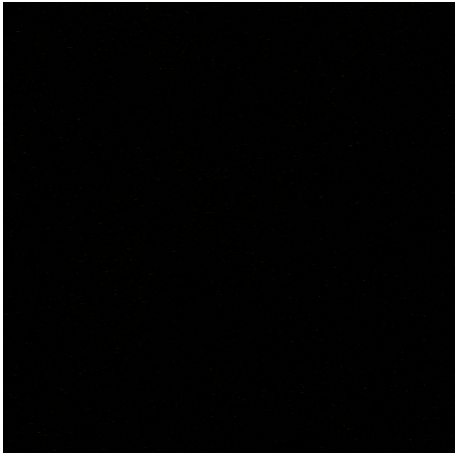

Merge

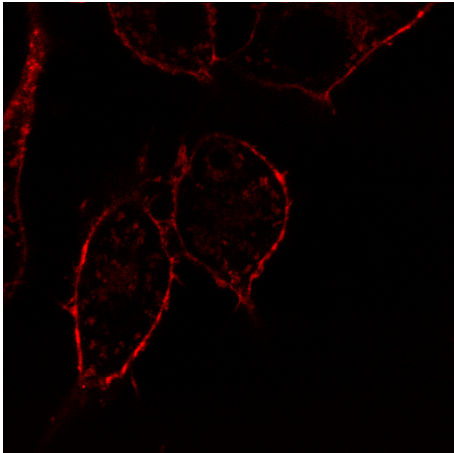

## Supplementary Figure 3

***M.tb*-infected RAW264.7 cell lysate**      **Recombinant human Lipocalin-2**

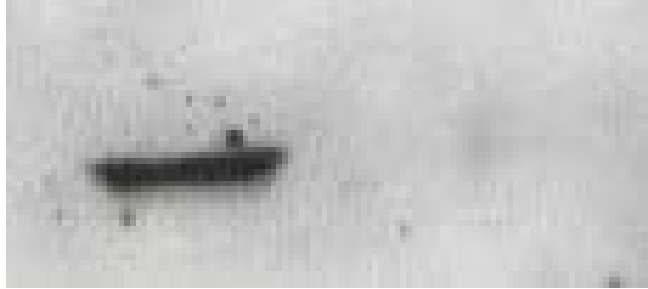

Supplement: NIHMS923579-supplement-Supplementary_figures.pdf [file NIHMS923579-supplement-Supplementary_figures.pdf]
